# Supplementary material for: Coexistence of room temperature magneto-chiral dichroism and magneto-electric coupling in a chiral nanomagnet
Source: Royal Society of Chemistry journal article supplement (doi:10.1039/d4nr04422c), 2024-12-06
Supplement: d4nr04422c1.pdf [file d4nr04422c1.pdf]

# Coexistence of Room Temperature Magneto-Chiral Dichroism and Magneto-Electric Coupling in a Chiral Nanomagnet

Langit Cahya Adi,<sup>[a]</sup> Maxime Aragon-Alberti,<sup>[a,b]</sup> Geert L.J.A. Rikken,<sup>[a]</sup> Cyrille Train,<sup>[a]</sup>  
Jérôme Long,<sup>[b],[c]\*</sup> Matteo Atzori<sup>[a],\*</sup>

- [a] Laboratoire National des Champs Magnétiques Intenses (LNCMI), CNRS, Univ. Grenoble Alpes, INSA Toulouse, Univ. Toulouse Paul Sabatier, EMFL, F-38042 Grenoble – France.
- [b] Institut Charles Gerhardt Montpellier, UMR 5253, Université de Montpellier, ENSCM, CNRS, Place E. Bataillon, F-34095 Montpellier – France.
- [c] Institut Universitaire de France (IUF), 1 rue Descartes, 75231 Paris – France.

## Corresponding authors:

Dr. Matteo Atzori, [matteo.atzori@lncmi.cnrs.fr](mailto:matteo.atzori@lncmi.cnrs.fr)

Prof. Jérôme Long, [jerome.long@umontpellier.fr](mailto:jerome.long@umontpellier.fr)

## SUPPLEMENTARY INFORMATION

## EXPERIMENTAL SECTION

**Synthesis.** The samples were prepared and characterized according to the published procedures.<sup>S1</sup> The ligand 6,6'-((1E,1'E)-(((1R,2R)-1,2-diphenylethane-1,2-diyl)bis(azaneylylidene))bis(methaneylylidene))bis(2-methoxyphenol) (*R,R*-H<sub>2</sub>L) or 6,6'-((1E,1'E)-(((1S,2S)-1,2-diphenylethane-1,2-diyl)bis(azaneylylidene))bis(methaneylylidene))bis(2-methoxyphenol) (*S,S*-H<sub>2</sub>L) have been synthesized according to the published procedure.<sup>S1</sup>

The stoichiometric reaction between *R,R*-H<sub>2</sub>L (0.1 mmol, 0.046 g), Zn(OAc)·2H<sub>2</sub>O (0.1 mmol, 0.022 g) and Yb(NO<sub>3</sub>)<sub>3</sub>·5H<sub>2</sub>O (0.1 mmol, 0.045 g) in 10 mL of a methanol/acetonitrile (4:1) mixture, gives a clear yellow solution. Slow vapour diffusion of diethyl-ether into the yellow solution leads to the formation of block-shaped yellow crystals of **1-(*R,R*)** suitable for MChD measurements. The same procedure was used to obtain **1-(*S,S*)** starting from *S,S*-H<sub>2</sub>L.

**Magnetic measurements.** Magnetic measurements as a function of temperature were performed in the 2.0-300 K temperature range with an applied magnetic field of 1.0 T on a polycrystalline sample of **1-(*R,R*)** by using a *Quantum Design MPMS3-VSM-SQUID* magnetometer. The microcrystalline sample was finely grounded and pressed in the form of a pellet to avoid microcrystalline orientations. Magnetization measurements as a function of an externally applied magnetic field were collected on the same sample at *T* = 4.0 K with magnetic fields up to +7 T. Susceptibility data were corrected for the sample holders previously measured in the same conditions and for the diamagnetic contributions as by using Pascal's constant tables.<sup>S2</sup>

**Magneto-Chiral Dichroism Spectroscopy.** Magneto-Chiral Dichroism spectra were recorded with a home-made multichannel MChD spectrometer operating in the visible and near infrared spectral window (400–1600 nm) between 4.0 and 290 K with an alternating magnetic field ***B*** up to ±2 T. MChD spectra were acquired on single crystals of enantiopure **1-(*R,R*)** and **1-(*S,S*)**. The samples were mounted on a titanium sample holder over a 0.5 mm hole diameter centred with respect to a 1.0 mm diameter collimated beam. Measurements were performed in the 4.0–290 K range with an alternating magnetic field ***B*** = ±1.0 T and frequency  $\Omega = 0.04$  Hz. MChD spectra as a function of the magnetic field were recorded at *T* = 4.0 K for alternating magnetic fields of different amplitudes (0.0-2.0 T). Unpolarized light was provided by a broadband Energetiq – Hamamatsu Laser Driven Light Sources (EQ-99X-FC-S or EQ-77X-FC-S). MChD spectra were obtained at each temperature/magnetic field value by collecting, on average, 30.000 spectra with an integration time of 25 ms. The spectra were collected with a high resolution/high sensitivity Optosky detector equipped with a thermoelectric cooled sensor operating in the 200–1000 nm spectral region with an analogic/digital convertor of 16 bits. Each spectrum was correlated to a

specific magnetic field value by a dual channel digitizer (Picoscope 5000B) acquiring simultaneously triggers from the spectrometer and the magnetic field from a calibrated Hall effect sensor (Lakeshore) placed in proximity of the sample. Data were then post-processed as a synchronous detection with a specific MatLab routine to obtain the MChD spectra.

The MChD dissymmetry factor  $g_{MChD}$  is defined as follows:

$$g_{MChD} = \frac{\Delta A_{MChD}}{A B} \quad (\text{eq. S1})$$

where  $\Delta A_{MChD}$  is the differential absorption coefficient between the light absorption collected under a magnetic field parallel and antiparallel oriented with respect to the light wavevector  $\mathbf{k}$ ,  $A$  is the effective absorption coefficients of the electronic transitions at zero field and  $B$  is the applied magnetic field intensity.

### **Theoretical Calculations.**

CASSCF calculations were performed with ORCA 5.0 software<sup>S3,S4</sup> using the crystallographic structures without any structural geometry optimization. Tolerance for energy convergence is fixed at  $10^{-7}$  Eh. An active space considering the seven 4f orbitals with 13 electrons CAS (13, 7) for all the doublets (7 roots) was considered. To account for dynamic correlation effects and provide a more accurate picture of the CF splitting, second-order N-Electron perturbation theory (NEVPT2) calculations were performed on top of the CASSCF calculations. The def2 Ahlrichs basis sets were used: DKH-DEF2-TZVP for all atoms, except for Yb for which SARC2-DKH-QZVP basis set was employed. The AUTOAUX feature was employed to automatically generate auxiliary basis sets within the RIJCOSX approximation to speed up the calculations. Finally, the SINGLE\_ANISO program<sup>S4</sup> implemented in ORCA was utilized to obtain detailed information about magnetic relaxation.

## ADDITIONAL FIGURES AND TABLES

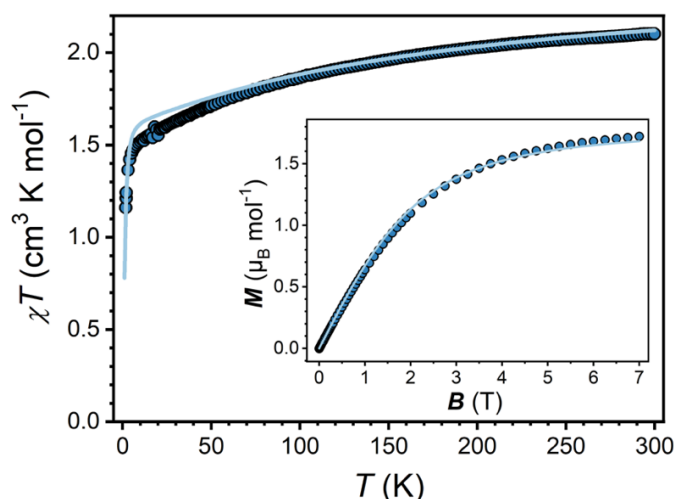

**Figure S1.** Temperature dependence (2-300 K) of the molar magnetic susceptibility times the temperature ( $\chi T$ ) under an applied static magnetic field  $B = 1.0$  T for a finely grounded microcrystalline sample of **1-(R,R)**. Inset shows the magnetization curve as a function of the magnetic field intensity at  $T = 4.0$  K. The solid lines account for the calculated values from theoretical calculations downscaled by about 10% with respect to the experimental data.

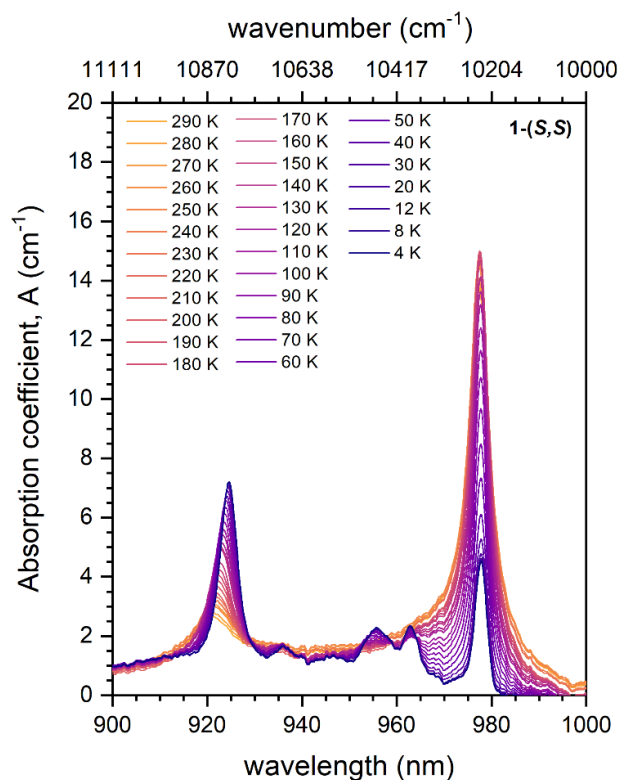

**Figure S2.** Thermal variation of the absorption coefficient for a single crystal of **1-(R,R)** ( $k_{\perp}(0,-1,1)$ ) in the 900-1000 nm range.

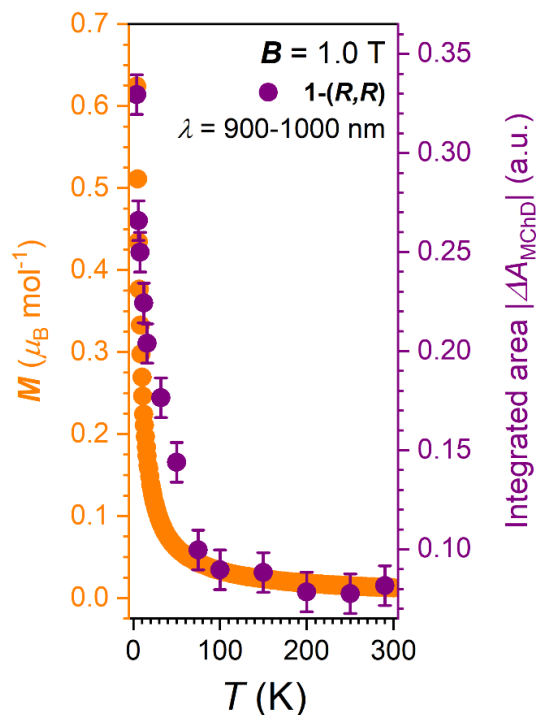

**Figure S3.** Temperature dependence of  $\Delta A_{\text{MChD}}$  (integrated absolute area of the overall  ${}^2F_{7/2} \leftarrow {}^2F_{5/2}$  multiplet  $\lambda = 900\text{-}1000$  nm) compared to the magnetization data recorded on a finely grounded microcrystalline sample of **1-(R,R)** under the same applied magnetic field  $B = 1.0$  T.

**Table S1.** *Ab initio* calculated energies,  $g$ -tensor main values of the ground doublet and the  $n^{\text{th}}$  KD doublet for the ground multiplet  $J = 7/2$  obtained for **Yb1** of **1-(R,R)**.

| CASSCF |                            |            |            |            |                                                               |
|--------|----------------------------|------------|------------|------------|---------------------------------------------------------------|
| KD     | Energy (cm <sup>-1</sup> ) | $g_x$      | $g_y$      | $g_z$      | Wavefunction (only components with > 20 % are given)          |
| 0      | 0                          | 0.48911927 | 0.80066600 | 7.56304043 | 94.6%   $\pm 7/2$ >                                           |
| 1      | 197                        | 4.54825284 | 3.52712890 | 1.19587360 | 72.9%   $\pm 5/2$ >                                           |
| 2      | 437                        | 0.98668224 | 1.27830005 | 4.30320799 | 46.0%   $\pm 3/2$ >; 28.9%   $\pm 1/2$ >; 22.2%   $\pm 5/2$ > |
| 3      | 575                        | 0.41755301 | 0.55279656 | 7.45859501 | 61.4%   $\pm 1/2$ >; 34.1%   $\pm 3/2$ >                      |
| NEVPT2 |                            |            |            |            |                                                               |
| KD     | Energy (cm <sup>-1</sup> ) | $g_x$      | $g_y$      | $g_z$      | Wavefunction (only components with > 20 % are given)          |
| 0      | 0.00                       | 0.55125575 | 0.90915232 | 7.51638665 | 94.0%   $\pm 7/2$ >                                           |
| 1      | 224                        | 4.76473305 | 2.99164483 | 1.02756954 | 76.9%   $\pm 5/2$ >                                           |
| 2      | 558                        | 1.48328089 | 1.60992603 | 4.05250395 | 51.9%   $\pm 3/2$ >; 26.7%   $\pm 1/2$ >                      |
| 3      | 713                        | 0.31826735 | 0.43113190 | 7.49285237 | 64.4%   $\pm 1/2$ >; 31.4%   $\pm 3/2$ >                      |

**Table S2.** *Ab initio* calculated energies of the ground doublet and the  $n^{\text{th}}$  KD doublet for the multiplet  $J = 5/2$  obtained for **Yb1** of **1-(R,R)**.

| CASSCF |                            |                                     |
|--------|----------------------------|-------------------------------------|
| KD     | Energy (cm <sup>-1</sup> ) | Energy rescaled (cm <sup>-1</sup> ) |
| 0'     | 10143                      | 0                                   |
| 1'     | 10381                      | 238                                 |
| 2'     | 10636                      | 493                                 |
| NEVPT2 |                            |                                     |
| KD     | Energy (cm <sup>-1</sup> ) | Energy rescaled (cm <sup>-1</sup> ) |
| 0'     | 10156                      | 0                                   |
| 1'     | 10452                      | 296                                 |
| 2'     | 10777                      | 621                                 |

**Table S3.** *Ab initio* calculated energies,  $g$ -tensor main values of the ground doublet and the  $n^{\text{th}}$  KD doublet for the ground multiplet  $J = 7/2$  obtained for **Yb2** of **1-(S,S)**.

| CASSCF |                            |            |            |            |                                                               |
|--------|----------------------------|------------|------------|------------|---------------------------------------------------------------|
| KD     | Energy (cm <sup>-1</sup> ) | $g_x$      | $g_y$      | $g_z$      | Wavefunction (only components with > 20 % are given)          |
| 0      | 0                          | 0.39260608 | 0.75718215 | 7.57227107 | 94.4%   $\pm 7/2$ >                                           |
| 1      | 198                        | 4.52627306 | 3.64928336 | 1.07890249 | 72.8%   $\pm 5/2$ >                                           |
| 2      | 420                        | 0.67414124 | 1.25857337 | 4.48299877 | 45.4%   $\pm 3/2$ >; 29.4%   $\pm 1/2$ >; 22.4%   $\pm 5/2$ > |
| 3      | 560                        | 0.51891643 | 0.62553761 | 7.42920966 | 60.5%   $\pm 1/2$ >; 34.6%   $\pm 3/2$ >                      |
| NEVPT2 |                            |            |            |            |                                                               |
| KD     | Energy (cm <sup>-1</sup> ) | $g_x$      | $g_y$      | $g_z$      | Wavefunction (only components with > 20 % are given)          |
| 0      | 0                          | 0.39571912 | 0.76796636 | 7.56438092 | 94.1%   $\pm 7/2$ >                                           |
| 1      | 231                        | 4.78619781 | 3.04355095 | 0.91611097 | 78.7%   $\pm 5/2$ >                                           |
| 2      | 542                        | 1.12311714 | 1.88266121 | 4.24414673 | 50.9%   $\pm 3/2$ >; 29.0%   $\pm 1/2$ >                      |
| 3      | 701                        | 0.43447747 | 0.49925249 | 7.46083346 | 62.6%   $\pm 1/2$ >; 33.0%   $\pm 3/2$ >                      |

**Table S4.** *Ab initio* calculated energies of the ground doublet and the  $n^{\text{th}}$  KD doublet for the multiplet  $J = 5/2$  obtained for **Yb2** of **1-(S,S)**.

| CASSCF |                            |                                     |
|--------|----------------------------|-------------------------------------|
| KD     | Energy (cm <sup>-1</sup> ) | Energy rescaled (cm <sup>-1</sup> ) |
| 0'     | 10144                      | 0                                   |
| 1'     | 10375                      | 228                                 |
| 2'     | 10621                      | 477                                 |
| NEVPT2 |                            |                                     |
| KD     | Energy (cm <sup>-1</sup> ) | Energy rescaled (cm <sup>-1</sup> ) |
| 0'     | 10157                      | 0                                   |
| 1'     | 10449                      | 291                                 |
| 2'     | 10764                      | 607                                 |

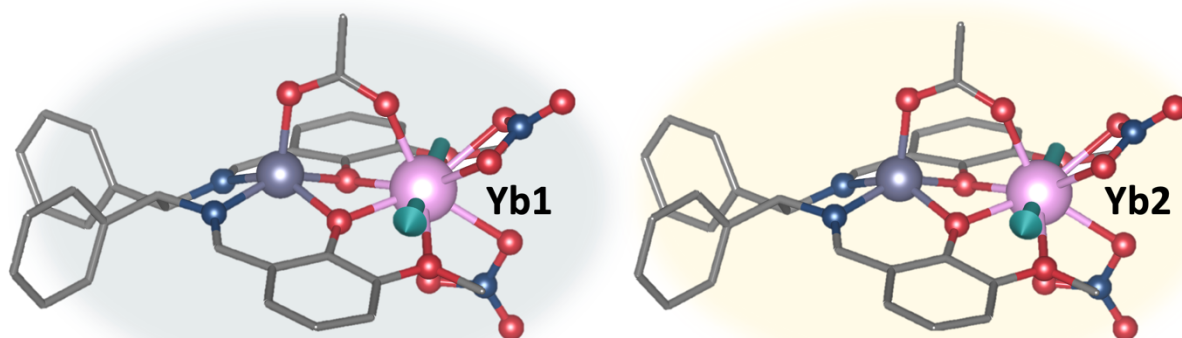

**Figure S4.** Orientation of the magnetic easy-axis (green arrow) related to the ground Kramers doublet (0) for the two crystallographically independent Yb<sup>III</sup> ions.

## SUPPORTING REFERENCES

- S1. J. Long, M. S. Ivanov, V. A. Khomchenko, E. Mamontova, J.-M. Thibaud, J. Rouquette, M. Beaudhuin, D. Granier, R. A. S. Ferreira, L. D. Carlos, B. Donnadieu, M. S. C. Henriques, J. A. Paixão, Y. Guari, J. Larionova, *Science* **2020**, *367*, 671–676.
- S2. G. A. Bain, J. F. Berry, *J. Chem. Educ.* **2008**, *85*, 532.
- S3. F. Neese, *Wiley Interdiscip. Rev. Comput. Mol. Sci.*, **2012**, *2*, 73-78.
- S4. F. Neese, *Wiley Interdiscip. Rev. Comput. Mol. Sci.*, **2022**, *12*, e1606.
- S5. L. Ungur and L. F. Chibotaru, *SINGLE\_ANISO Program* **2006-2013**.
